# Supplementary material
Source: MDPI journal article supplement (https://www.mdpi.com/2071-1050/15/12/9442)

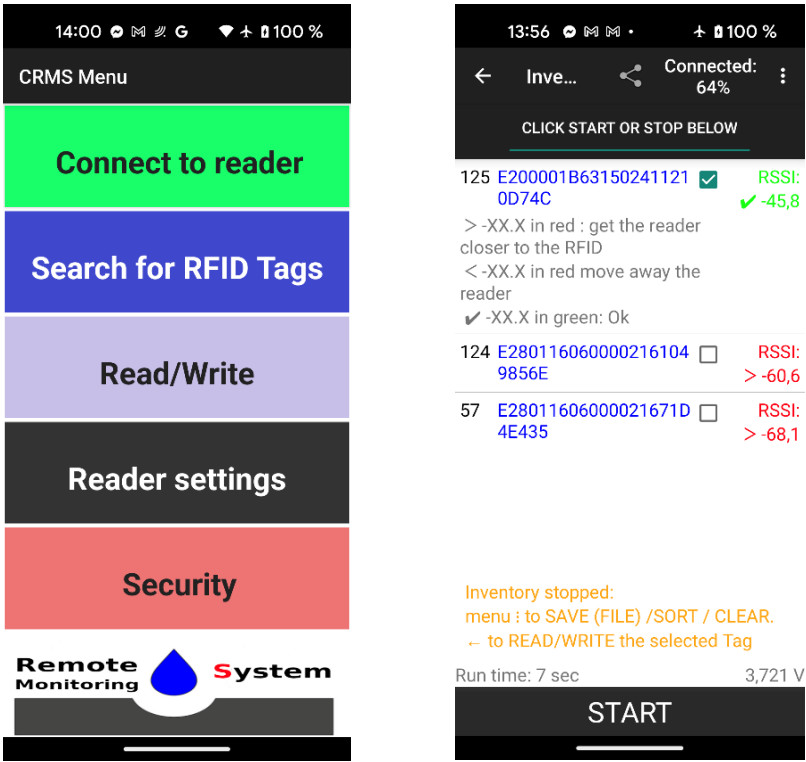

Figure S1. Mobile application for interrogating the RFID sensors.

Supplement: s1 [file s1]
